# Supplementary material for: Cyanidin-3-O-glucoside represses tumor growth and invasionin vivoby suppressing autophagyviainhibition of the JNK signaling pathways
Source: Royal Society of Chemistry journal article supplement (doi:10.1039/d0fo02107e), 2020-11-26
Supplement: d0fo02107e1.pdf [file d0fo02107e1.pdf]

## Supporting information

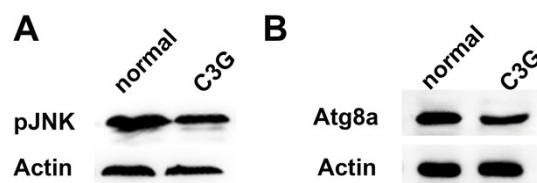

**Figure S1. C3G repressed the expression of pJNK and Atg8a in tumor flies.**

(A) Western blot of pJNK of tumor flies cultured on normal food and C3G. Compared with normal condition, C3G can reduce the expression of the phosphorylated JNK at 7 days AEL. (B) Western blot of Atg8a of tumor flies cultured on normal food and C3G. C3G can inhibit the expression of Atg8a in tumor files.

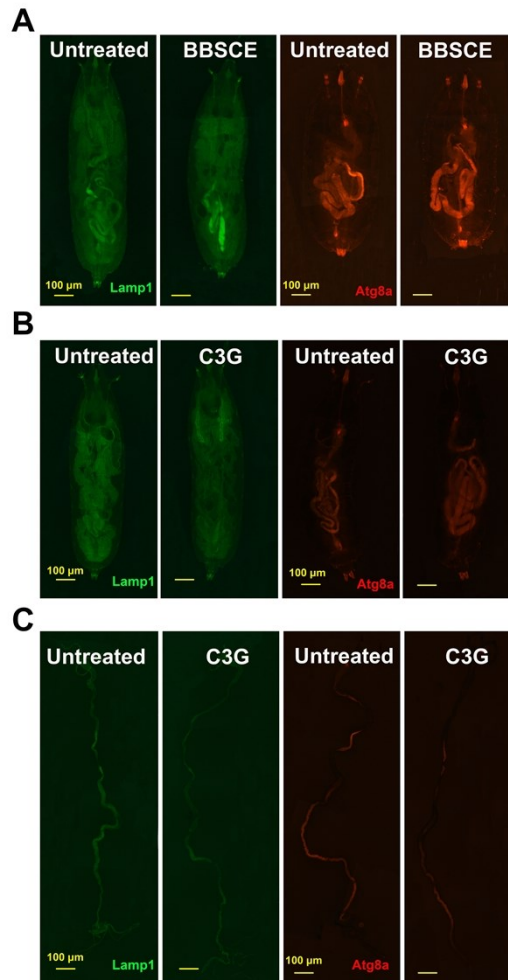

**Figure S2. The autophagy levels in the whole body and gut of normal flies were not affected by BBSCE or C3G.**

(A) No obvious difference of the expression of early autophagosome marker Atg8 $\alpha$  and late autolysosome marker Lamp1 was observed in the whole body of tumor flies cultured on normal food and BSSCE. (B) No obvious difference of the expression of early autophagosome marker Atg8 $\alpha$  and late autolysosome marker Lamp1 was observed in the whole body of tumor flies cultured on normal food and C3G. (C) C3G did not affect the expression of early autophagosome marker Atg8 $\alpha$  and late autolysosome marker Lamp1 in the gut of tumor flies.
